# Supplementary material for: Epidemiological Survey and Risk Factor Analysis of 14 Potential Pathogens in Golden Snub-Nosed Monkeys at Shennongjia National Nature Reserve, China
Source: MDPI journal article supplement (doi:10.3390/pathogens12030483), 2023-03-18
Supplement: s1 [file s1]

Supplementary Table S1. Information on the growth pattern, sampling season, age, sex and infection status of golden snub-nosed monkeys (n=26) at Shennongjia National Nature Reserve, China.

| Monkey name | Raising patterns | Seasons | Age       | Sex | MAH | HAV | RhCMV | SFV | Infection status    |
|-------------|------------------|---------|-----------|-----|-----|-----|-------|-----|---------------------|
| V-1         |                  |         |           |     |     |     |       |     |                     |
| Jiaojiao    | C                | S       | Adult     | F   | ×   | ×   | ×     | ×   | No infection        |
| Beibei      | C                | S       | Adult     | M   | ×   | ×   | ×     | ×   | No infection        |
| Huahua      | C                | S       | Adult     | F   | √   | ×   | ×     | ×   | Single infection    |
| Qiangqiang  | C                | S       | Adult     | M   | √   | ×   | √     | ×   | Double infection    |
| Shennv      | C                | S       | Sub-adult | F   | √   | ×   | ×     | ×   | Single infection    |
| Linlin      | C                | S       | Sub-adult | F   | ×   | ×   | ×     | ×   | No infection        |
| Qiaoqiao    | C                | S       | Adult     | F   | ×   | ×   | ×     | ×   | No infection        |
| Xiaohongtou | F                | S       | Adult     | M   | √   | ×   | √     | ×   | Double infection    |
| Xingxing    | F                | S       | Adult     | M   | √   | ×   | ×     | ×   | Single infection    |
| Changmao    | F                | S       | Adult     | M   | √   | ×   | ×     | ×   | Single infection    |
| Kaixin      | F                | S       | Adult     | F   | ×   | ×   | ×     | √   | Single infection    |
| Tuanyuan    | F                | S       | Sub-adult | F   | √   | ×   | ×     | ×   | Single infection    |
| Yezi        | F                | S       | Sub-adult | F   | ×   | ×   | ×     | ×   | No infection        |
| Xiaoli      | F                | S       | Adult     | F   | √   | ×   | √     | ×   | Double infection    |
| Xingfeng    | F                | S       | Adult     | F   | √   | ×   | ×     | √   | Double infection    |
| Xiaolongnv  | F                | S       | Sub-adult | F   | √   | ×   | √     | ×   | Double infection    |
| Duanwei     | C                | S       | Adult     | M   | √   | ×   | √     | √   | Triple infection    |
| Fanfan      | C                | S       | Sub-adult | M   | ×   | ×   | √     | ×   | Single infection    |
| Dahai       | C                | S       | Sub-adult | M   | ×   | ×   | ×     | ×   | No infection        |
| Junjun      | F                | S       | Adult     | F   | √   | ×   | √     | √   | Triple infection    |
| 21          | F                | W       | Adult     | F   | ×   | ×   | ×     | ×   | No infection        |
| 22          | F                | W       | Adult     | F   | √   | ×   | √     | √   | Triple infection    |
| 23          | F                | W       | Adult     | M   | √   | ×   | ×     | ×   | Single infection    |
| 24          | F                | W       | Adult     | M   | ×   | ×   | √     | ×   | Single infection    |
| 25          | C                | W       | Adult     | F   | √   | √   | √     | √   | Quadruple infection |
| 26          | C                | W       | Adult     | F   | ×   | √   | ×     | √   | Double infection    |

Raising patterns:(C: Captive, F: Free-ranging, S: Summer, W: Winter; Sex: F: Female, M: Male; ×: not infected; √: infected.
